# Supplementary material for: Determination of a pharmacokinetic model for [11C]-acetate in brown adipose tissue
Source: Springer Nature journal article supplement (doi:10.1186/s13550-019-0497-6), 2019-03-27
Supplement: MOESM3 [file 16579584]

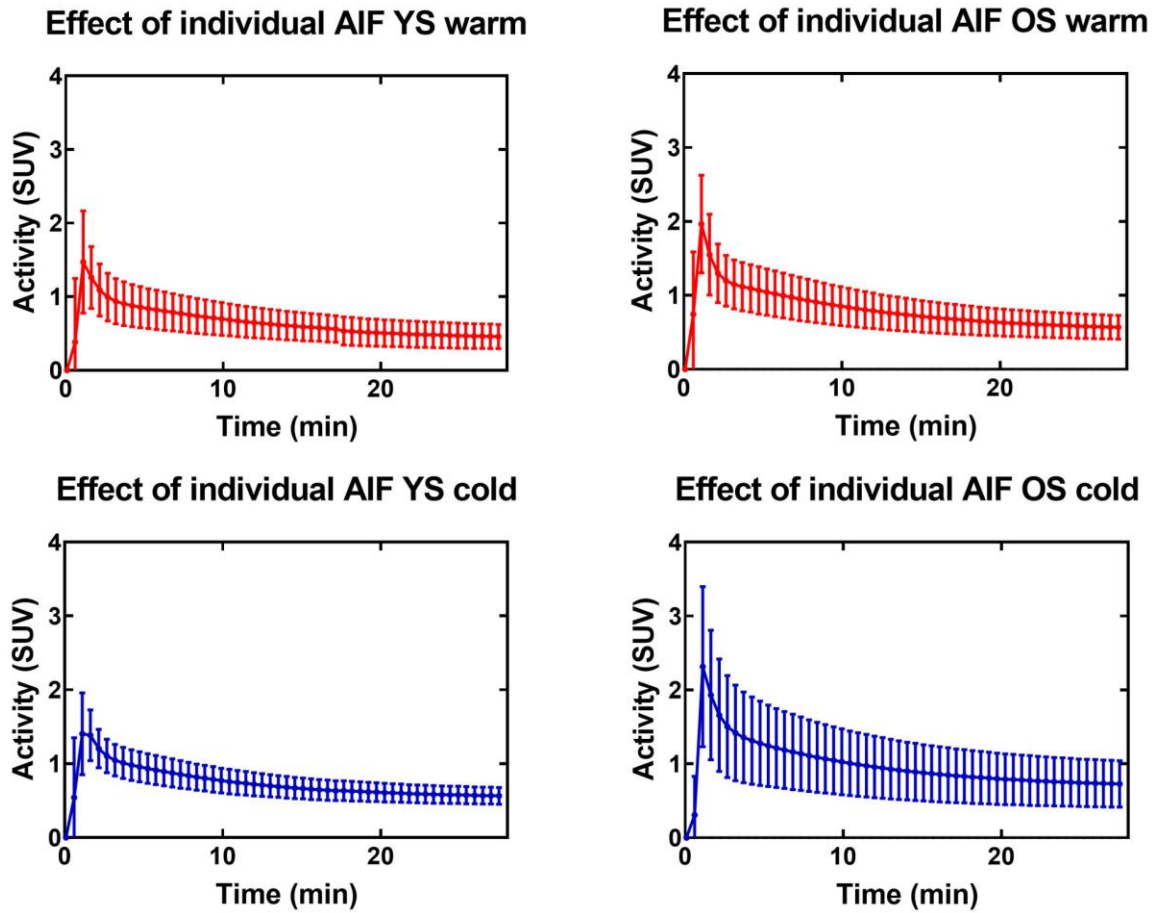

**Supplementary Fig. 1** TAC variability induced by individual AIF for model #4 and set parameters:  $K_1=0.07$  mL/g/min,  $k_2=0.14$  min<sup>-1</sup>,  $k_3=0.05$  min<sup>-1</sup>,  $v_b=0.10$ . YS: younger subjects, OS: older subjects

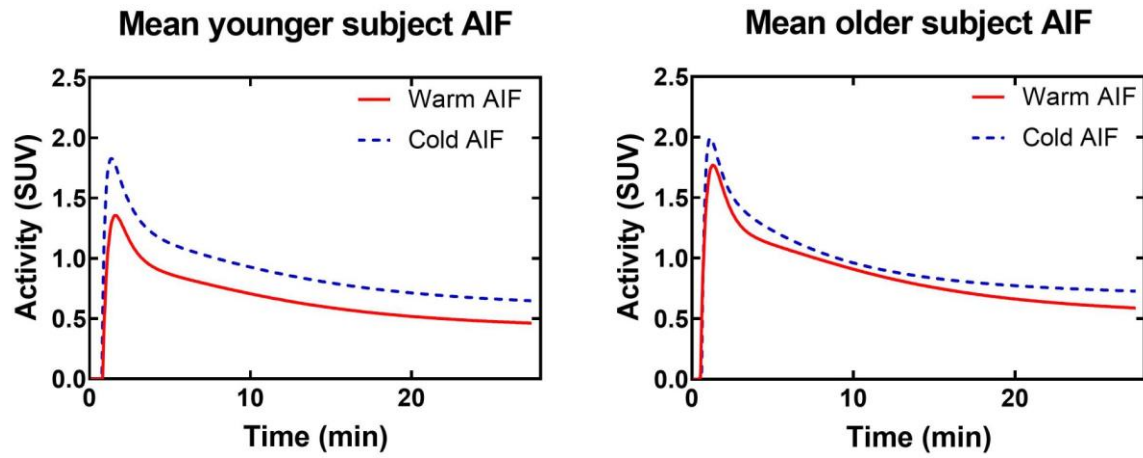

**Supplementary Fig. 2** TAC generated using average AIF for model #4 and set parameters:  $K_1=0.07$  mL/g/min,  $k_2=0.14$  min<sup>-1</sup>,  $k_3=0.05$  min<sup>-1</sup>,  $v_b=0.10$
