# Supplementary material for: Determination of a pharmacokinetic model for [11C]-acetate in brown adipose tissue
Source: Springer Nature journal article supplement (doi:10.1186/s13550-019-0497-6), 2019-03-27
Supplement: MOESM4 [file 16579584]

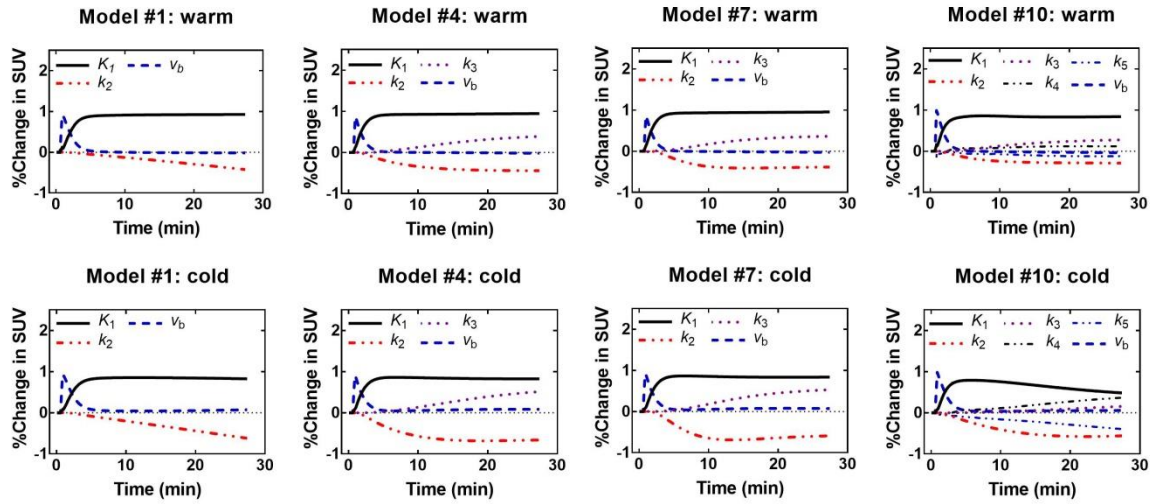

**Supplementary Fig. 3** Sensitivity profiles for healthy older subjects. Sensitivity analysis was performed only for the most promising models.

**Supplementary table 1** Correlation matrices for parameters in model #1 sensitivity/specificity analysis

| Warm             |       |       |       |                |       |       |       |
|------------------|-------|-------|-------|----------------|-------|-------|-------|
| Younger subjects |       |       |       | Older subjects |       |       |       |
|                  | $K_1$ | $k_2$ | $v_b$ |                | $K_1$ | $k_2$ | $v_b$ |
| $K_1$            | 1     |       |       | $K_1$          | 1     |       |       |
| $k_2$            | 0.88  | 1     |       | $k_2$          | 0.89  | 1     |       |
| $v_b$            | -0.27 | -0.26 | 1     | $v_b$          | -0.38 | -0.29 | 1     |
| Cold             |       |       |       |                |       |       |       |
| Younger subjects |       |       |       | Older subjects |       |       |       |
|                  | $K_1$ | $k_2$ | $v_b$ |                | $K_1$ | $k_2$ | $v_b$ |
| $K_1$            | 1     |       |       | $K_1$          | 1     |       |       |
| $k_2$            | 0.87  | 1     |       | $k_2$          | 0.86  | 1     |       |
| $v_b$            | -0.34 | -0.18 | 1     | $v_b$          | -0.39 | -0.26 | 1     |

Initial kinetic parameter values were based on human data (20 younger subjects, 7 older subjects). Strong correlations are highlighted.

**Supplementary table 2** Correlation matrices for parameters in model #4 sensitivity/specificity analysis

| Warm             |       |       |       |       |                |       |        |       |       |
|------------------|-------|-------|-------|-------|----------------|-------|--------|-------|-------|
| Younger controls |       |       |       |       | Older controls |       |        |       |       |
|                  | $K_1$ | $k_2$ | $k_3$ | $v_b$ |                | $K_1$ | $k_2$  | $k_3$ | $v_b$ |
| $K_1$            | 1     |       |       |       | $K_1$          | 1     |        |       |       |
| $k_2$            | 0.60  | 1     |       |       | $k_2$          | 0.85  | 1      |       |       |
| $k_3$            | -0.75 | -0.10 | 1     |       | $k_3$          | -0.50 | -0.089 | 1     |       |
| $v_b$            | -0.33 | -0.17 | 0.29  | 1     | $v_b$          | -0.43 | -0.29  | 0.27  | 1     |
| Cold             |       |       |       |       |                |       |        |       |       |
| Younger controls |       |       |       |       | Older controls |       |        |       |       |
|                  | $K_1$ | $k_2$ | $k_3$ | $v_b$ |                | $K_1$ | $k_2$  | $k_3$ | $v_b$ |
| $K_1$            | 1     |       |       |       | $K_1$          | 1     |        |       |       |
| $k_2$            | 0.91  | 1     |       |       | $k_2$          | 0.92  | 1      |       |       |
| $k_3$            | 0.59  | 0.84  | 1     |       | $k_3$          | 0.65  | 0.88   | 1     |       |
| $v_b$            | -0.44 | -0.33 | -0.23 | 1     | $v_b$          | -0.47 | -0.36  | -0.23 | 1     |

Initial kinetic parameter values were based on human data (20 younger subjects, 7 older subjects). Strong correlations are highlighted.

**Supplementary table 3** Correlation matrices for parameters in model #7 sensitivity/specificity analysis.

| Warm             |       |        |       |       |                |       |       |       |       |
|------------------|-------|--------|-------|-------|----------------|-------|-------|-------|-------|
| Younger controls |       |        |       |       | Older controls |       |       |       |       |
|                  | $K_1$ | $k_2$  | $k_3$ | $v_b$ |                | $K_1$ | $k_2$ | $k_3$ | $v_b$ |
| $K_1$            | 1     |        |       |       | $K_1$          | 1     |       |       |       |
| $k_2$            | 0.87  | 1      |       |       | $k_2$          | 0.90  | 1     |       |       |
| $k_3$            | -0.82 | -0.60  | 1     |       | $k_3$          | -0.98 | -0.80 | 1     |       |
| $v_b$            | -0.37 | -0.34  | 0.34  | 1     | $v_b$          | -0.43 | -0.32 | 0.46  | 1     |
| Cold             |       |        |       |       |                |       |       |       |       |
| Younger controls |       |        |       |       | Older controls |       |       |       |       |
|                  | $K_1$ | $k_2$  | $k_3$ | $v_b$ |                | $K_1$ | $k_2$ | $k_3$ | $v_b$ |
| $K_1$            | 1     |        |       |       | $K_1$          | 1     |       |       |       |
| $k_2$            | 0.71  | 1      |       |       | $k_2$          | 0.85  | 1     |       |       |
| $k_3$            | -0.62 | -0.076 | 1     |       | $k_3$          | 0.39  | 0.79  | 1     |       |
| $v_b$            | -0.37 | -0.18  | 0.098 | 1     | $v_b$          | -0.45 | -0.31 | -0.12 | 1     |

Initial kinetic parameter values were based on human data (20 younger subjects, 7 older subjects). Strong correlations are highlighted.

**Supplementary table 4** Correlation matrices for parameters in model #10  
sensitivity/specificity analysis

| Warm             |        |       |       |       |        |       |                |        |       |        |       |       |       |
|------------------|--------|-------|-------|-------|--------|-------|----------------|--------|-------|--------|-------|-------|-------|
| Younger controls |        |       |       |       |        |       | Older controls |        |       |        |       |       |       |
|                  | $K_1$  | $k_2$ | $k_3$ | $k_4$ | $k_5$  | $v_b$ |                | $K_1$  | $k_2$ | $k_3$  | $k_4$ | $k_5$ | $v_b$ |
| $K_1$            | 1      |       |       |       |        |       | $K_1$          | 1      |       |        |       |       |       |
| $k_2$            | 0.94   | 1     |       |       |        |       | $k_2$          | 0.95   | 1     |        |       |       |       |
| $k_3$            | 0.73   | 0.91  | 1     |       |        |       | $k_3$          | 0.83   | 0.94  | 1      |       |       |       |
| $k_4$            | 0.83   | 0.80  | 0.61  | 1     |        |       | $k_4$          | 0.79   | 0.81  | 0.65   | 1     |       |       |
| $k_5$            | 0.046  | 0.051 | 0.028 | 0.26  | 1      |       | $k_5$          | 0.99   | 0.94  | 0.82   | 0.77  | 1     |       |
| $v_b$            | -0.50  | -0.44 | -0.29 | -0.37 | -0.004 | 1     | $v_b$          | -0.31  | -0.23 | -0.17  | -0.19 | -0.32 | 1     |
| Cold             |        |       |       |       |        |       |                |        |       |        |       |       |       |
| Younger controls |        |       |       |       |        |       | Older controls |        |       |        |       |       |       |
|                  | $K_1$  | $k_2$ | $k_3$ | $k_4$ | $k_5$  | $v_b$ |                | $K_1$  | $k_2$ | $k_3$  | $k_4$ | $k_5$ | $v_b$ |
| $K_1$            | 1      |       |       |       |        |       | $K_1$          | 1      |       |        |       |       |       |
| $k_2$            | 0.10   | 1     |       |       |        |       | $k_2$          | 0.066  | 1     |        |       |       |       |
| $k_3$            | 0.88   | -0.2  | 1     |       |        |       | $k_3$          | -0.073 | -1    | 1      |       |       |       |
| $k_4$            | 0.95   | 0.23  | 0.77  | 1     |        |       | $k_4$          | -0.98  | 0.071 | -0.058 | 1     |       |       |
| $k_5$            | 0.83   | -0.43 | 0.97  | 0.72  | 1      |       | $k_5$          | -0.35  | -0.96 | 0.96   | 0.22  | 1     |       |
| $v_b$            | -0.057 | -0.38 | 0.15  | -0.12 | 0.20   | 1     | $v_b$          | 0.10   | 0.29  | -0.31  | -0.11 | -0.33 | 1     |

Initial kinetic parameter values were based on human data (20 younger subjects, 7 older subjects). Strong correlations are highlighted.
